# Supplementary material for: Selective Light-Triggered Release of DNA from Gold Nanorods Switches Blood Clotting On and Off
Source: PubMed Central journal article supplement (PMC3722233; doi:10.1371/journal.pone.0068511), 2013-07-24
Supplement: pone.0068511.s005.pdf [file pone.0068511.s005.pdf]

**Table S1:** *Statistics for blood clotting tests.* Two-tailed t-tests were performed using Origin 6.1.

We report here the p-values of the samples that show significant differences. For each experiment, the baseline (no laser irradiation) was compared with the measured value of  $t_{plasma}$ .

| <b>Sample</b>                                               | <b>Mean</b> | <b>s.d.</b> | <b>n</b> | <b>p value</b> |
|-------------------------------------------------------------|-------------|-------------|----------|----------------|
| NR-Thiol-TBA<br>no irradiation                              | 1.0         | 0.17        | 5        |                |
| NR-Thiol-TBA<br>800nm irradiation <i>-Figure S2b</i>        | 1.47        | 0.02        | 3        | <b>3.16E-3</b> |
| NR-HS-TBA<br>no irradiation                                 | 1.0         | 0.16        | 6        |                |
| NR-HS-TBA<br>800nm irradiation <i>-Figure 3c</i>            | 1.61        | 0.17        | 5        | <b>1.68E-4</b> |
| NR-HS-TBA+NB-HS-anti<br>no irradiation                      | 1.0         | 0.2         | 10       |                |
| NR-HS-TBA+NB-HS-anti<br>800nm irradiation <i>-Figure 4c</i> | 1.73        | 0.34        | 9        | <b>2.02E-5</b> |
